# Supplementary material for: Deep learning empowered volume delineation of whole-body organs-at-risk for accelerated radiotherapy
Source: PubMed Central journal article supplement (PMC9630370; doi:10.1038/s41467-022-34257-x), 2022-11-02
Supplement: 41467_2022_34257_MOESM1_ESM.pdf [file 41467_2022_34257_MOESM1_ESM.pdf]

## Supplementary Information for

### **Deep learning empowered volume delineation of whole-body organs-at-risk for accelerated radiotherapy**

Feng Shi<sup>1,#</sup>, Weigang Hu<sup>2,3,#</sup>, Jiaojiao Wu<sup>1,#</sup>, Miaofei Han<sup>1</sup>, Jiazhou Wang<sup>2,3</sup>, Wei Zhang<sup>4</sup>, Qing Zhou<sup>1</sup>, Jingjie Zhou<sup>4</sup>, Ying Wei<sup>1</sup>, Ying Shao<sup>1</sup>, Yanbo Chen<sup>1</sup>, Yue Yu<sup>1</sup>, Xiaohuan Cao<sup>1</sup>, Yiqiang Zhan<sup>1</sup>, Xiang Sean Zhou<sup>1</sup>, Yaozong Gao<sup>1,\*</sup>, Dinggang Shen<sup>5,1,6,\*</sup>

<sup>1</sup>*Department of Research and Development, Shanghai United Imaging Intelligence Co., Ltd., Shanghai, China*

<sup>2</sup>*Department of Radiation Oncology, Fudan University Shanghai Cancer Center, Shanghai, China*

<sup>3</sup>*Department of Oncology, Shanghai Medical College, Fudan University, Shanghai, China*

<sup>4</sup>*Radiotherapy Business Unit, Shanghai United Imaging Healthcare Co., Ltd., Shanghai, China*

<sup>5</sup>*School of Biomedical Engineering, ShanghaiTech University, Shanghai, China*

<sup>6</sup>*Shanghai Clinical Research and Trial Center, Shanghai, China*

# F. Shi, W. Hu, and J. Wu contributed equally to this work.

\* Corresponding authors: Yaozong Gao, [yaozong.gao@uii-ai.com](mailto:yaozong.gao@uii-ai.com)

Dinggang Shen, [Dinggang.Shen@gmail.com](mailto:Dinggang.Shen@gmail.com)

#### **The PDF file includes:**

Supplementary Figs. 1 to 3

Supplementary Tables 1 to 6

Supplementary References

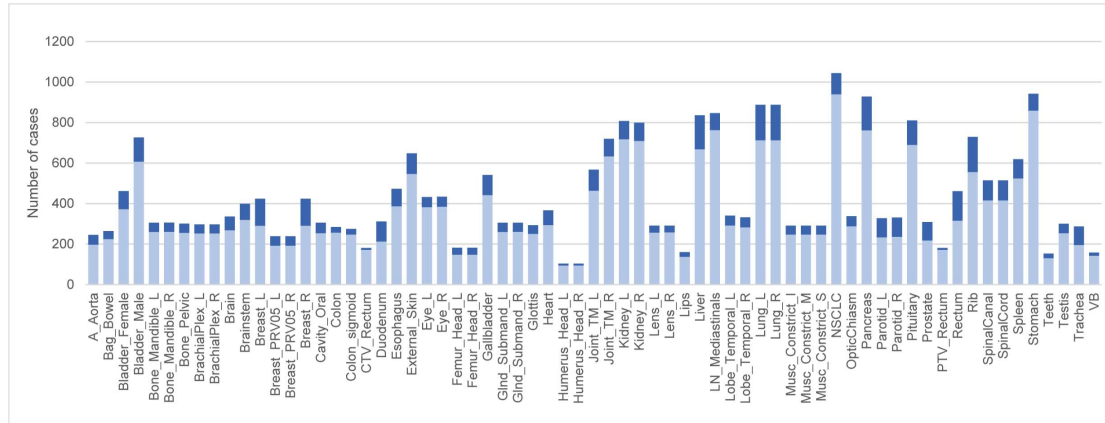

**Supplementary Fig. 1. RTP-Net is evaluated on a large-scale dataset of 28,581 cases for 67 segmentation tasks, from which 28,219 cases are OAR-related and the rest are tumor-related. In each bar, the darker one represents the testing set, and the lighter one represents the training set.**

**Supplementary Table 1. The Dice coefficients of RTP-Net in segmenting whole-body OARs. Each Dice coefficient is represented with a mean and 95% confidence interval (CI).**

| No. | Head part       | Dice coefficient     | No. | Chest part     | Dice coefficient     |
|-----|-----------------|----------------------|-----|----------------|----------------------|
| 1   | Brain           | 0.993 (0.992, 0.994) | 1   | Lung_L         | 0.988 (0.988, 0.989) |
| 2   | Lens_L          | 0.985 (0.975, 0.995) | 2   | Lung_R         | 0.988 (0.988, 0.989) |
| 3   | Eye_R           | 0.977 (0.974, 0.981) | 3   | Esophagus      | 0.975 (0.962, 0.988) |
| 4   | Eye_L           | 0.972 (0.966, 0.977) | 4   | Humerus_Head_L | 0.972 (0.961, 0.983) |
| 5   | Bone_Mandible_R | 0.952 (0.946, 0.958) | 5   | Humerus_Head_R | 0.971 (0.960, 0.982) |
| 6   | Bone_Mandible_L | 0.951 (0.944, 0.959) | 6   | Heart          | 0.969 (0.962, 0.976) |
| 7   | Parotid_R       | 0.951 (0.947, 0.956) | 7   | VB             | 0.969 (0.964, 0.975) |
| 8   | Brainstem       | 0.941 (0.938, 0.945) | 8   | Breast_R       | 0.968 (0.964, 0.971) |
| 9   | Cavity_Oral     | 0.924 (0.916, 0.932) | 9   | Trachea        | 0.960 (0.954, 0.965) |
| 10  | Parotid_L       | 0.905 (0.897, 0.914) | 10  | Breast_PRV05_L | 0.947 (0.939, 0.954) |
| 11  | Lens_R          | 0.892 (0.871, 0.912) | 11  | Breast_PRV05_R | 0.942 (0.935, 0.950) |
| 12  | Joint_TM_L      | 0.886 (0.866, 0.906) | 12  | Breast_L       | 0.937 (0.933, 0.941) |
| 13  | Joint_TM_R      | 0.856 (0.838, 0.874) | 13  | A_Aorta        | 0.934 (0.914, 0.954) |
| 14  | Glnd_Submand_R  | 0.852 (0.833, 0.872) | 14  | Rib            | 0.933 (0.930, 0.935) |
| 15  | Teeth           | 0.845 (0.816, 0.873) | 15  | NSCLC          | 0.858 (0.834, 0.883) |

|     |                    |                      |     |                 |                      |
|-----|--------------------|----------------------|-----|-----------------|----------------------|
| 16  | Lips               | 0.844 (0.827, 0.861) | 16  | LN_Mediastinals | 0.606 (0.571, 0.640) |
| 17  | Lobe_Temporal_L    | 0.843 (0.830, 0.857) |     |                 |                      |
| 18  | Lobe_Temporal_R    | 0.840 (0.826, 0.853) | No. | Abdomen part    | Dice coefficient     |
| 19  | Glnd_Submand_L     | 0.833 (0.805, 0.861) | 1   | Liver           | 0.980 (0.977, 0.983) |
| 20  | Musc_Constrict_I   | 0.804 (0.788, 0.821) | 2   | Kidney_L        | 0.979 (0.972, 0.985) |
| 21  | Glottis            | 0.798 (0.782, 0.815) | 3   | Kidney_R        | 0.978 (0.975, 0.980) |
| 22  | Musc_Constrict_S   | 0.784 (0.768, 0.800) | 4   | Stomach         | 0.978 (0.971, 0.985) |
| 23  | Musc_Constrict_M   | 0.737 (0.710, 0.763) | 5   | Bag_Bowel       | 0.973 (0.970, 0.976) |
| 24  | Pituitary          | 0.736 (0.717, 0.754) | 6   | Spleen          | 0.969 (0.965, 0.973) |
| 25  | OpticChiasm        | 0.632 (0.602, 0.662) | 7   | Gallbladder     | 0.944 (0.936, 0.953) |
| 26  | BrachialPlex_R     | 0.607 (0.586, 0.629) | 8   | Pancreas        | 0.907 (0.898, 0.916) |
| 27  | BrachialPlex_L     | 0.603 (0.578, 0.628) | 9   | Colon           | 0.874 (0.839, 0.910) |
|     |                    |                      | 10  | Duodenum        | 0.837 (0.818, 0.857) |
| No. | Pelvic cavity part | Dice coefficient     | No. | Whole body      | Dice coefficient     |
| 1   | Bone_Pelvic        | 0.982 (0.978, 0.987) | 1   | SpinalCanal     | 0.939 (0.934, 0.944) |
| 2   | Femur_Head_R       | 0.981 (0.978, 0.985) | 2   | SpinalCord      | 0.911 (0.897, 0.924) |
| 3   | Femur_Head_L       | 0.973 (0.970, 0.975) | 3   | External_Skin   | 0.997 (0.997, 0.997) |
| 4   | Bladder_Male       | 0.955 (0.944, 0.966) |     |                 |                      |
| 5   | Rectum             | 0.937 (0.928, 0.946) |     |                 |                      |
| 6   | Testis             | 0.913 (0.890, 0.937) |     |                 |                      |
| 7   | Bladder_Female     | 0.902 (0.874, 0.931) |     |                 |                      |
| 8   | Prostate           | 0.899 (0.888, 0.909) |     |                 |                      |
| 9   | Colon_sigmoid      | 0.846 (0.805, 0.886) |     |                 |                      |

**Supplementary Table 2. Dice coefficients of eight segmentation tasks by our proposed RTP-Net, U-Net, nnU-Net, and Swin UNETR.** The dice coefficient is represented with mean and 95% CI. Statistical analyses are performed using two-way ANOVA followed by Dunnett’s multiple comparison tests. The number of eight organs can be referred to Supplementary Fig. 1. The two-tailed adjusted p values of Dice coefficients between RTP-Net and other three methods (U-Net, nnU-Net, and Swin UNETR) are 0.596, 0.999, and 0.965 for brain segmentation, respectively; < 0.001, 0.234, and 0.001 for brainstem segmentation, respectively; 0.206, 0.181, and 0.183 for rib segmentation, respectively; 0.367, 0.986, and 0.010 for heart segmentation, respectively; 0.002, 0.999, 0.003 for liver segmentation, respectively; 0.991, 0.900, and 0.803 for pelvic segmentation, respectively; < 0.001, 0.010, and 0.003 for rectum segmentation, respectively; 0.999, 0.827, and 0.932 for bladder segmentation, respectively.

|           | RTP-Net                 | U-Net                   | nnU-Net                 | Swin UNETR              | $P_{(RTP-Net vs. U-Net)}$ | $P_{(RTP-Net vs. nnU-Net)}$ | $P_{(RTP-Net vs. Swin UNETR)}$ |
|-----------|-------------------------|-------------------------|-------------------------|-------------------------|---------------------------|-----------------------------|--------------------------------|
| Brain     | 0.993<br>(0.992, 0.994) | 0.901<br>(0.847, 0.956) | 0.994<br>(0.993, 0.995) | 0.976<br>(0.946, 1.000) | 0.596                     | 0.999                       | 0.965                          |
| Brainstem | 0.941<br>(0.938, 0.945) | 0.915<br>(0.903, 0.926) | 0.930<br>(0.926, 0.934) | 0.916<br>(0.912, 0.921) | < 0.001                   | 0.234                       | 0.001                          |
| Rib       | 0.939<br>(0.936, 0.941) | 0.925<br>(0.921, 0.928) | 0.941<br>(0.938, 0.945) | 0.924<br>(0.921, 0.928) | 0.206                     | 0.181                       | 0.183                          |
| Heart     | 0.969<br>(0.962, 0.976) | 0.928<br>(0.893, 0.963) | 0.967<br>(0.962, 0.971) | 0.947<br>(0.937, 0.958) | 0.367                     | 0.986                       | 0.010                          |
| Liver     | 0.980<br>(0.977, 0.983) | 0.963<br>(0.953, 0.973) | 0.980<br>(0.976, 0.983) | 0.964<br>(0.959, 0.969) | 0.002                     | 0.999                       | 0.003                          |
| Pelvis    | 0.982<br>(0.978, 0.987) | 0.980<br>(0.976, 0.984) | 0.977<br>(0.955, 0.987) | 0.976<br>(0.972, 0.979) | 0.991                     | 0.900                       | 0.803                          |
| Rectum    | 0.937<br>(0.928, 0.946) | 0.824<br>(0.795, 0.853) | 0.921<br>(0.913, 0.930) | 0.906<br>(0.887, 0.926) | < 0.001                   | 0.010                       | 0.003                          |
| Bladder   | 0.892<br>(0.861, 0.923) | 0.804<br>(0.750, 0.859) | 0.903<br>(0.877, 0.928) | 0.889<br>(0.856, 0.923) | 0.999                     | 0.827                       | 0.932                          |

**Supplementary Table 3. Inference times (in second) in segmenting eight OARs by our proposed RTP-Net, U-Net, nnU-Net, and Swin UNETR.** Time is represented with mean and 95% CI. Statistical analyses are performed using two-way ANOVA followed by Dunnett’s multiple comparison tests. The number of eight organs can be referred to Supplementary Fig. 1. All two-tailed adjusted  $p$  values between RTP-Net and other three methods in eight organs are lower than 0.001.

|           | RTP-Net              | U-Net                      | nnU-Net                       | Swin UNETR                 | $P_{(RTP-Net vs. U-Net)}$ | $P_{(RTP-Net vs. nnU-Net)}$ | $P_{(RTP-Net vs. Swin UNETR)}$ |
|-----------|----------------------|----------------------------|-------------------------------|----------------------------|---------------------------|-----------------------------|--------------------------------|
| Brain     | 0.48<br>(0.44, 0.52) | 86.27<br>(69.97, 102.57)   | 328.30<br>(224.54, 432.06)    | 70.84<br>(50.33, 91.36)    | < 0.001                   | < 0.001                     | < 0.001                        |
| Brainstem | 0.13<br>(0.11, 0.14) | 81.58<br>(71.03, 92.13)    | 256.93<br>(196.06, 317.80)    | 62.60<br>(50.41, 74.79)    | < 0.001                   | < 0.001                     | < 0.001                        |
| Rib       | 4.87<br>(4.65, 5.09) | 48.10<br>(46.69, 49.52)    | 1033.82<br>(947.71, 1119.93)  | 19.24<br>(17.77, 20.71)    | < 0.001                   | < 0.001                     | < 0.001                        |
| Heart     | 0.51<br>(0.48, 0.53) | 68.22<br>(56.66, 79.78)    | 1573.83<br>(1036.13, 2111.54) | 38.28<br>(28.60, 47.96)    | < 0.001                   | < 0.001                     | < 0.001                        |
| Liver     | 1.08<br>(1.03, 1.13) | 46.70<br>(45.23, 48.17)    | 761.61<br>(699.95, 823.28)    | 20.79<br>(19.29, 22.30)    | < 0.001                   | < 0.001                     | < 0.001                        |
| Pelvis    | 1.28<br>(1.16, 1.39) | 119.24<br>(105.85, 132.63) | 1845.30<br>(1486.18, 2204.41) | 57.88<br>(48.71, 67.06)    | < 0.001                   | < 0.001                     | < 0.001                        |
| Rectum    | 0.32<br>(0.31, 0.33) | 164.76<br>(155.90, 173.62) | 1163.37<br>(1102.64, 1224.10) | 159.98<br>(151.43, 168.52) | < 0.001                   | < 0.001                     | < 0.001                        |
| Bladder   | 0.23<br>(0.21, 0.25) | 85.31<br>(74.36, 96.26)    | 1379.01<br>(1083.79, 1674.23) | 161.54<br>(135.26, 187.82) | < 0.001                   | < 0.001                     | < 0.001                        |

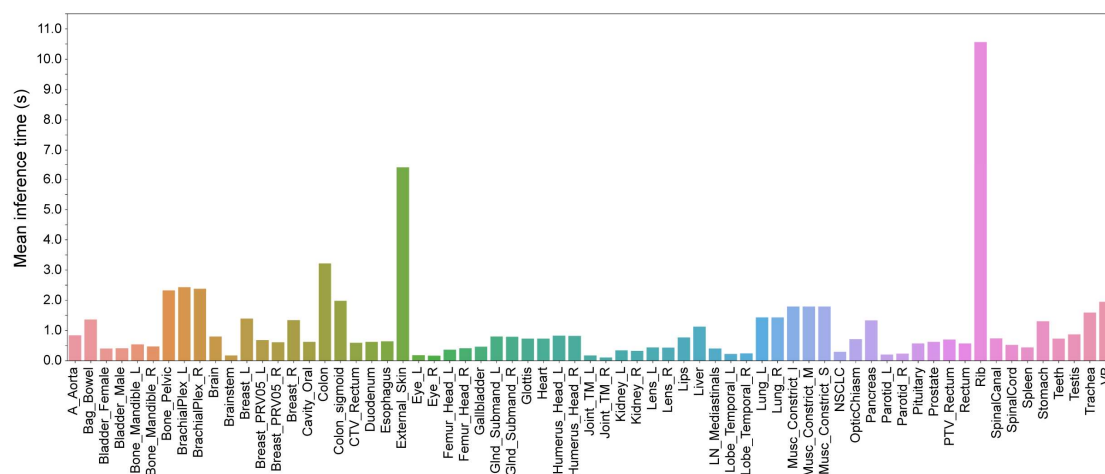

**Supplementary Fig. 2. Mean inference time of RTP-Net on 67 delineation tasks.**

**Supplementary Table 4. Dice coefficients and inference times (in second) of four methods in target volume delineation.** All descriptions are represented with mean and 95% CI. Statistical analyses are performed using two-way ANOVA followed by Dunnett's multiple comparison tests, with  $n = 10$  replicates per condition. The two-tailed adjusted  $p$  values of Dice coefficients between RTP-Net and other three methods (U-Net, nnU-Net, and Swin UNETR) are 0.420, 0.999, and 0.166 for CTV segmentation, respectively, while 0.951, 0.859, and 0.832 for PTV segmentation, respectively. All two-tailed adjusted  $p$  values of inference times between RTP-Net and other three methods are lower than 0.001.

|                    |     | RTP-Net                 | U-Net                     | nnU-Net                    | Swin UNETR               | $P_{(RTP-Net vs. U-Net)}$ | $P_{(RTP-Net vs. nnU-Net)}$ | $P_{(RTP-Net vs. Swin UNETR)}$ |
|--------------------|-----|-------------------------|---------------------------|----------------------------|--------------------------|---------------------------|-----------------------------|--------------------------------|
| Dice coefficient   | CTV | 0.910<br>(0.897, 0.923) | 0.893<br>(0.866, 0.919)   | 0.911<br>(0.902, 0.920)    | 0.885<br>(0.857, 0.913)  | 0.420                     | 0.999                       | 0.166                          |
|                    | PTV | 0.916<br>(0.908, 0.924) | 0.910<br>(0.882, 0.939)   | 0.925<br>(0.918, 0.932)    | 0.907<br>(0.874, 0.939)  | 0.951                     | 0.859                       | 0.832                          |
| Inference time (s) | CTV | 0.40<br>(0.36, 0.44)    | 108.41<br>(93.80, 123.02) | 248.43<br>(195.36, 301.50) | 62.63<br>(53.21, 72.05)  | < 0.001                   | < 0.001                     | < 0.001                        |
|                    | PTV | 0.44<br>(0.40, 0.48)    | 109.89<br>(95.10, 124.68) | 119.01<br>(93.33, 144.70)  | 92.65<br>(80.56, 104.74) | < 0.001                   | < 0.001                     | < 0.001                        |

**Supplementary Table 5. Imaging datasets used in this study.**

| Dataset                            | Acquisition site                                                                                                                                                                                                                                              | Region        | Scanner type                                                    | Organ part        |
|------------------------------------|---------------------------------------------------------------------------------------------------------------------------------------------------------------------------------------------------------------------------------------------------------------|---------------|-----------------------------------------------------------------|-------------------|
| TCIA <sup>1</sup>                  |                                                                                                                                                                                                                                                               |               |                                                                 |                   |
| • Head-Neck-PET-CT                 | Hôpital général juif (HGJ) de Montréal, QC, Canada;<br>Centre hospitalier universitaire de Sherbrooke (CHUS), QC, Canada;<br>Hôpital Maisonneuve-Rosemont (HMR) de Montréal, QC, Canada;<br>Centre hospitalier de l'Université de Montréal (CHUM), QC, Canada | North America | GE                                                              | Head              |
| • NSCLC Radiogenomics <sup>2</sup> | Stanford University Medical Center;<br>Palo Alto Veterans Affairs Healthcare System                                                                                                                                                                           | North America | GE                                                              | Chest             |
| • A whole-body CT dataset          | University Hospital Tübingen, Germany                                                                                                                                                                                                                         | Europe        | Siemens Biograph mCT                                            | ALL               |
| HaN (MICCAI 2015) <sup>3,4</sup>   | Harvard Medical School, Massachusetts General Hospital, USA                                                                                                                                                                                                   | North America | Anonymous                                                       | Head              |
| SegTHOR 2019 <sup>5</sup>          | Henri Becquerel Center (CHB), Rouen, France                                                                                                                                                                                                                   | Europe        | Anonymous                                                       | Chest             |
| CHAOS 2019 <sup>6</sup>            | Dokuz Eylul University Hospital, Izmir, Turkey                                                                                                                                                                                                                | Europe        | Philips SecuraCT;<br>Philips Mx8000 CT;<br>Toshiba; AquilionOne | Chest;<br>Abdomen |

|                                |                                                                                                                                                                                                                                                                                                                                                                                   |                                      |                                        |                               |
|--------------------------------|-----------------------------------------------------------------------------------------------------------------------------------------------------------------------------------------------------------------------------------------------------------------------------------------------------------------------------------------------------------------------------------|--------------------------------------|----------------------------------------|-------------------------------|
| MSD (MICCAI 2018) <sup>7</sup> | Ludwig Maximilian University of Munich, Germany;<br>Radboud University Medical Center of Nijmegen, The Netherlands;<br>Polytechnique and CHUM Research Center Montreal, Canada;<br>Tel Aviv University, Israel;<br>Sheba Medical Center, Israel;<br>IRCAD Institute Strasbourg, France;<br>Hebrew University of Jerusalem, Israel;<br>Memorial Sloan Kettering Cancer Center, USA | Europe;<br>North<br>America;<br>Asia | GE                                     | Chest;<br>Abdomen             |
| LUNA16 <sup>8</sup>            | Weill Cornell Medical College, USA;<br>University of California, Los Angeles, USA;<br>University of Chicago, USA;<br>University of Iowa, USA;<br>University of Michigan, USA                                                                                                                                                                                                      | North<br>America                     | GE;<br>Philips;<br>Siemens;<br>Toshiba | Chest (NSCLC)                 |
| Local dataset                  | Fudan University Shanghai Cancer Center                                                                                                                                                                                                                                                                                                                                           | Asia                                 | uRT-linac 506c                         | Tumor volume<br>(CTV and PTV) |

---



**Supplementary Table 6. Patient demographics of the imaging datasets.**

| Dataset                            | Patient age (years) | Patient sex          |
|------------------------------------|---------------------|----------------------|
| TCIA <sup>1</sup>                  |                     |                      |
| • Head-Neck-PET-CT                 | 63 (18 ~ 90)        | Male 76%; Female 24% |
| • NSCLC Radiogenomics <sup>2</sup> | 68 (24 ~ 87)        | Male 64%; Female 36% |
| • A whole-body CT dataset          | 59 (11 ~ 95)        | Male 44%; Female 56% |
| HaN (MICCAI 2015) <sup>3,4</sup>   | 57 (31 ~ 79)        | Male 88%; Female 12% |
| SegTHOR 2019 <sup>5</sup>          | Anonymous           | Anonymous            |
| CHAOS 2019 <sup>6</sup>            | 45 (18 ~ 63)        | Male 55%; Female 45% |
| MSD <sup>7</sup>                   | Anonymous           | Anonymous            |
| LUNA16 <sup>8</sup>                | 59 (14 ~ 85)        | Male 51%; Female 49% |
| Local dataset                      | Anonymous           | Anonymous            |

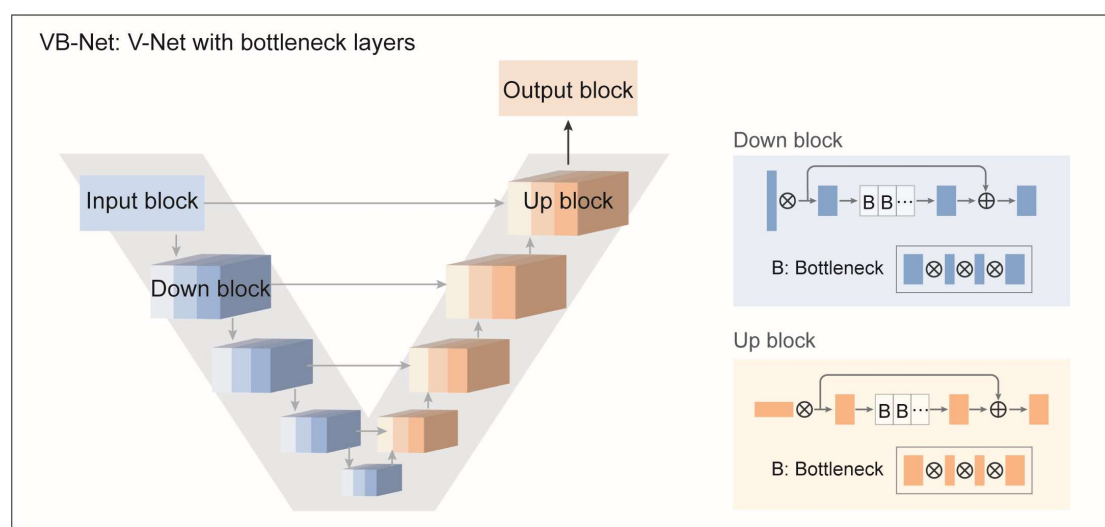

**Supplementary Fig. 3. The architecture of VB-Net.**

## Supplementary References

- 1 Clark, K. et al. The Cancer Imaging Archive (TCIA): Maintaining and operating a public information repository. *J. Digit. Imaging* **26**, 1045-1057 (2013).
- 2 Bakr, S. et al. Data descriptor: A radiogenomic dataset of non-small cell lung cancer. *Sci. Data* **5**, 180202 (2018).
- 3 Raudaschl, P. F. et al. Evaluation of segmentation methods on head and neck CT: Auto-Segmentation Challenge 2015. *Med. Phys.* **44**, 2020-2036 (2017).
- 4 Ang, K. K. et al. Randomized phase III trial of concurrent accelerated radiation plus cisplatin with or without cetuximab for stage III to IV head and neck carcinoma: RTOG 0522. *J. Clin. Oncol.* **32**, 2940-2950 (2014).
- 5 Lambert, Z., Petitjean, C., Dubray, B. & Ruan, S. SegTHOR: Segmentation of Thoracic Organs at Risk in CT images. *arXiv preprint arXiv: 1912.05950* (2019).
- 6 Kavur, A. E. et al. CHAOS Challenge - Combined (CT-MR) Healthy Abdominal Organ Segmentation. *Med. Image Anal.* **69**, 101950 (2021).
- 7 Simpson, A. L. et al. A large annotated medical image dataset for the development and evaluation of segmentation algorithms. *arXiv preprint arXiv: 1902.09063* (2019)
- 8 Armato S. G. et al. The Lung Image Database Consortium (LIDC) and Image Database Resource Initiative (IDRI): A completed reference database of lung nodules on CT scans. *Med. Phys.* **38**, 915-931 (2011).s
